# Supplementary material for: Fabrication of Co3O4/graphene oxide composites using supercritical fluid and their catalytic application for the decomposition of ammonium perchlorate
Source: Royal Society of Chemistry journal article supplement (doi:10.1039/c3ce41535j), 2014-01-01
Supplement: c3ce41535j.pdf [file c3ce41535j.pdf]

## Supporting Information

### **Fabrication of Co<sub>3</sub>O<sub>4</sub>/graphite oxide sheet composites using supercritical fluid and their catalytic application for the decomposition of ammonium perchlorate**

Jian Zhao\*, Zhensheng Liu, Yulei Qin and Wenbin Hu

*Key Laboratory of Rubber-Plastics of Ministry of Education/ Shandong*

*Provincial Key Laboratory of Rubber-Plastics (Qingdao University of Science and Technology), Qingdao 266042, China and Key Laboratory of Molecular Engineering of Polymers (Fudan University), Ministry of Education, Shanghai 200433, China*

\*Corresponding author: Fax: +86 0532 84022725; Tel: +86 0532 84023847; E-mail:

jian.zhao2010@gmail.com (J.Zhao)

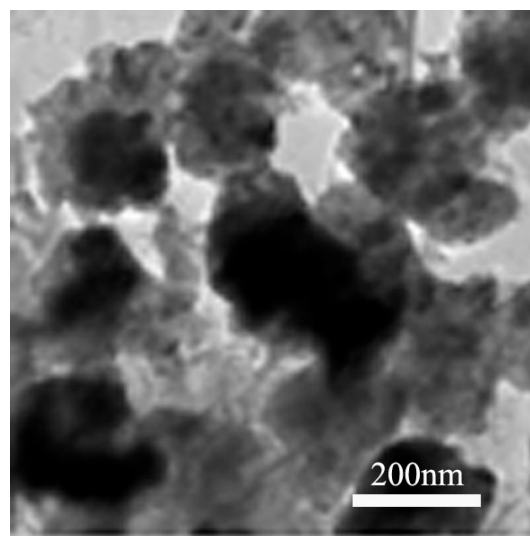

**Fig.1S.** TEM image of Co<sub>3</sub>O<sub>4</sub> synthesized without the support of GO sheets.

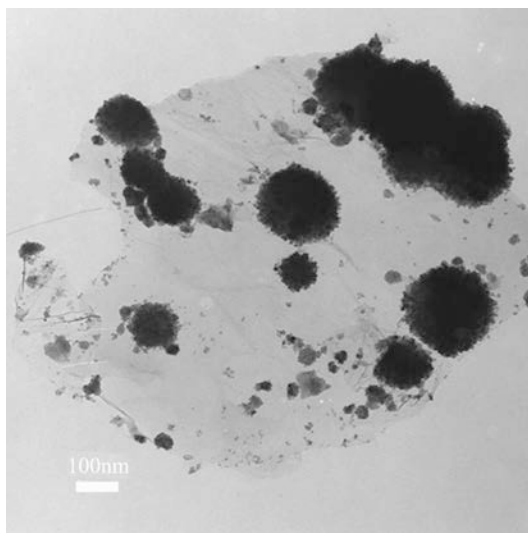

**Fig.2S.** TEM image of GO-Co<sub>3</sub>O<sub>4</sub> synthesized in the absence of SC CO<sub>2</sub>.

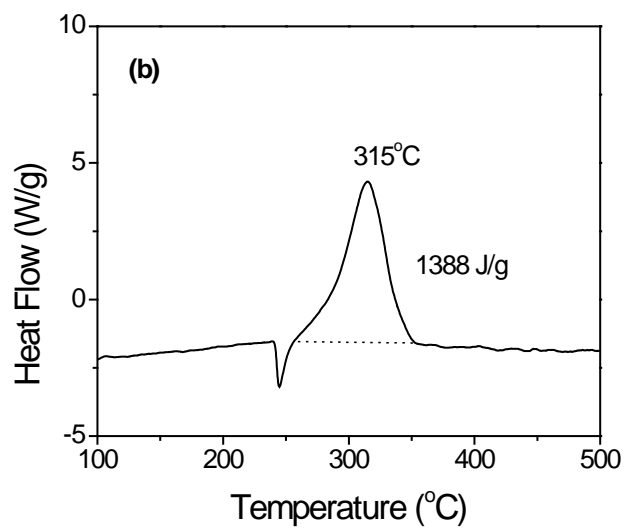

**Fig.3S.** DSC curves for thermal decomposition of AP with 2 wt% simple mixture of  $\text{Co}_3\text{O}_4$  (46.5 wt %) and GO.
